# Supplementary material for: Large discrepancies between event- and response-based compound flood hazard estimates
Source: Copernicus journal article supplement (doi:10.5194/egusphere-2025-1938), 2025-05-12
Supplement: Supplementary file 1 [file egusphere-2025-1938-supplement.pdf]

## Supplement of

# Large discrepancies between event- and response-based compound flood hazard estimates

**Table S1. Datasets, authors, and sources of the data used to setup the SFINCS model for Gloucester City (NJ).**

| Name              | Authors                        | Source                                                                                                                                                                                                                                          |
|-------------------|--------------------------------|-------------------------------------------------------------------------------------------------------------------------------------------------------------------------------------------------------------------------------------------------|
| Hydrologic Units  | NJDEP Bureau of GIS            | <a href="https://gisdata-njdep.opendata.arcgis.com/datasets/02599a9424254a4ea33e689941559e3c_17/explore">https://gisdata-njdep.opendata.arcgis.com/datasets/02599a9424254a4ea33e689941559e3c_17/explore</a>                                     |
| DEM<br>CoNED      | U.S. Geological Survey<br>NOAA | <a href="https://www.usgs.gov/special-topics/coastal-national-elevation-database-applications-project/data">https://www.usgs.gov/special-topics/coastal-national-elevation-database-applications-project/data</a>                               |
| Landcover classes | NJDEP Bureau of GIS            | <a href="https://gisdata-njdep.opendata.arcgis.com/documents/njdep::land-use-land-cover-of-new-jersey-2015-download/about">https://gisdata-njdep.opendata.arcgis.com/documents/njdep::land-use-land-cover-of-new-jersey-2015-download/about</a> |

**Table S2. Datasets searched and used for the SFINCS flood model validation.**

|   | Database              | Source                                                                                                                                                                                                                                                                                                                  | Resolution | # Events  |
|---|-----------------------|-------------------------------------------------------------------------------------------------------------------------------------------------------------------------------------------------------------------------------------------------------------------------------------------------------------------------|------------|-----------|
| 1 | Global Flood Database | <a href="https://global-flood-database.cloudtostreet.ai/#interactive-map">https://global-flood-database.cloudtostreet.ai/#interactive-map</a>                                                                                                                                                                           | 500-250m   | 1 in 2001 |
| 2 | USGS HWMs             | <a href="https://stn.wim.usgs.gov/fev/">https://stn.wim.usgs.gov/fev/</a>                                                                                                                                                                                                                                               | Point      | None      |
| 3 | NOAA Storm Events     | <a href="https://www.ncdc.noaa.gov/stormevents/">https://www.ncdc.noaa.gov/stormevents/</a><br>Keywords search: Coastal Flood, Flood, Heavy rain, Hurricane, Storm surge/tide, Tropical Storm, Tropical Depression, Winter Storm, Winter weather<br>Region: Camden County                                               | Narrative  | None      |
| 4 | FEMA                  | Flood Risk Map:<br><a href="https://map1.msc.fema.gov/data/FRP/FRM_Coastal_34007_20170424.pdf?LOC=f509865d8cfc4b3f81267fa59019847d">https://map1.msc.fema.gov/data/FRP/FRM_Coastal_34007_20170424.pdf?LOC=f509865d8cfc4b3f81267fa59019847d</a>                                                                          | Point      | 1 in 2009 |
| 5 | Local News            | <a href="https://www.courierpostonline.com/story/news/local/south-jersey/2019/06/20/floodwaters-ruin-artifacts-gloucester-city-historical-society/1514980001/">https://www.courierpostonline.com/story/news/local/south-jersey/2019/06/20/floodwaters-ruin-artifacts-gloucester-city-historical-society/1514980001/</a> | Point      | 1 in 2019 |

|   |                      |                                                                                                                                                                                                                                                                                                                 |               |                                            |
|---|----------------------|-----------------------------------------------------------------------------------------------------------------------------------------------------------------------------------------------------------------------------------------------------------------------------------------------------------------|---------------|--------------------------------------------|
|   |                      | <a href="https://www.courierpostonline.com/story/news/local/south-jersey/2019/06/21/westville-gloucester-city-clean-whats-left-after-flooding/1529203001/">https://www.courierpostonline.com/story/news/local/south-jersey/2019/06/21/westville-gloucester-city-clean-whats-left-after-flooding/1529203001/</a> |               |                                            |
| 6 | Global Flood Monitor | <a href="https://www.globalfloodmonitor.org/">https://www.globalfloodmonitor.org/</a><br>Tweet:<br><a href="https://twitter.com/stormchaser0026/status/1281677885124771840">https://twitter.com/stormchaser0026/status/1281677885124771840</a>                                                                  | Point         | 9 events, 1 with photo                     |
| 7 | MyCoast: New Jersey  | <a href="https://mycoast.org/nj/high-water">https://mycoast.org/nj/high-water</a>                                                                                                                                                                                                                               | Point         | None                                       |
| 8 | Local Authorities    | Camden County Municipal Utilities Authority (CCMUA)<br>Regional Flooding Study. Phase 1 Final Report. CDM Smith, 2023                                                                                                                                                                                           | Areas, points | 6 regions identified as frequently flooded |

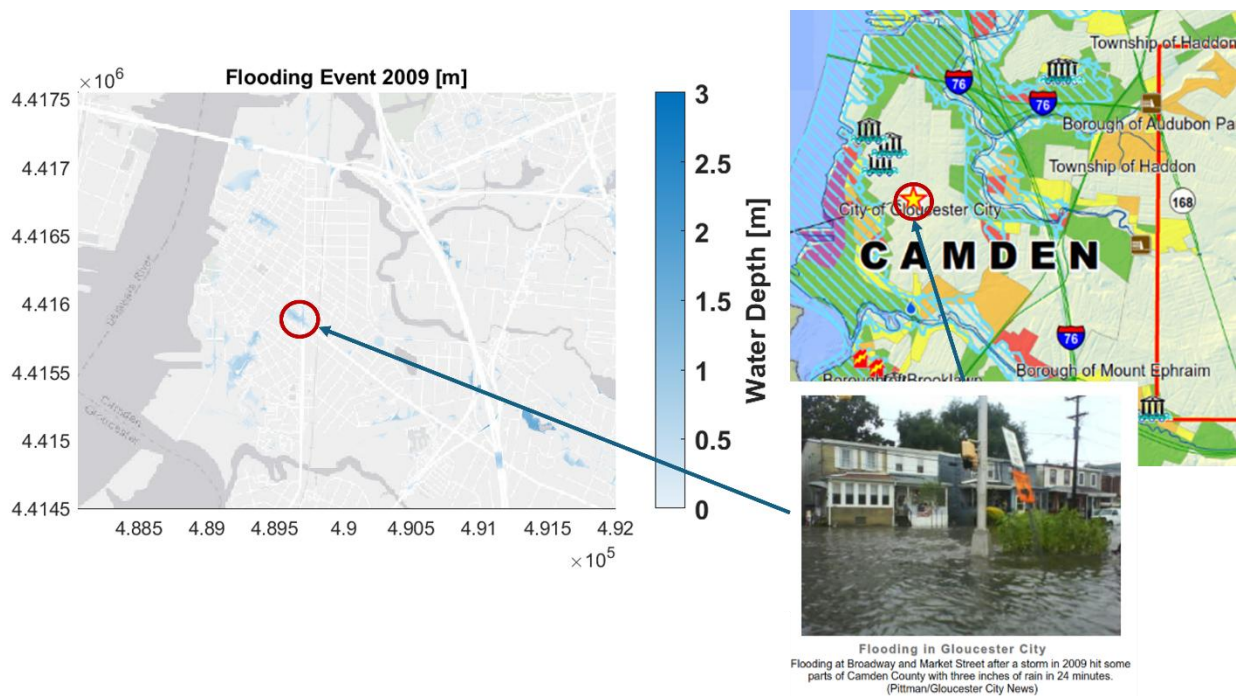

**Figure S1. Flood map resulting from the simulation (neglecting infiltration) of the 2009 flood event reported in the FEMA Risk Map. Average water depths of 36cm are estimated for the intersection shown in the photo (red circle). Figure from Pollack et al., (2024).**

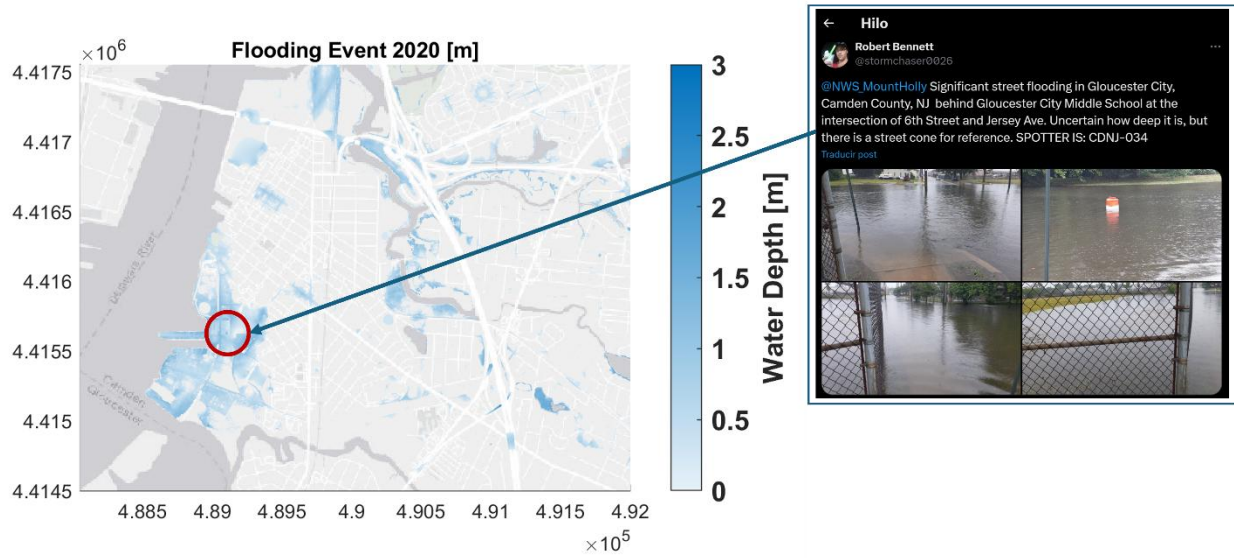

**Figure S2.** Flooding resulting from the simulation of the flood event in 2020 reported via Twitter and corresponding tweet showing flooding in the region marked with a red circle. Average water depths estimated by the SFINCS model are of 72 cm. Figure from Pollack et al., (2024).

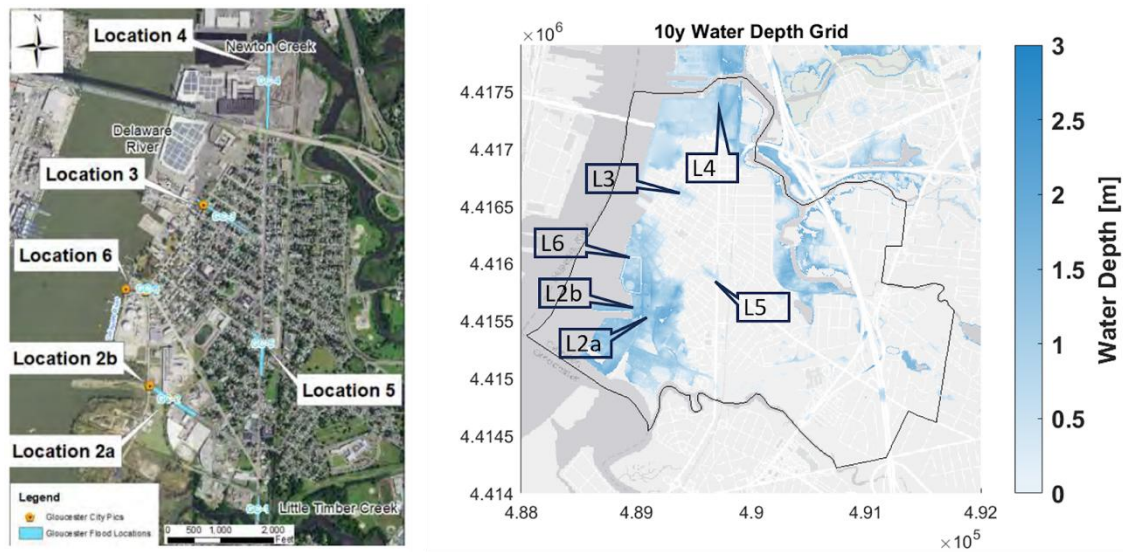

**Figure S3.** Left panel shows the locations in Gloucester City where flooding is frequently reported by the Camden County Municipal Utilities Authority (CCMUA) (source: Regional Flooding Study. Phase 1 Final Report. CDM Smith, 2023). Right panel shows the water depths from the simulation of the 10- year event, highlighting the flood prone areas identified by CCMUA. Figure from Pollack et al., (2024).

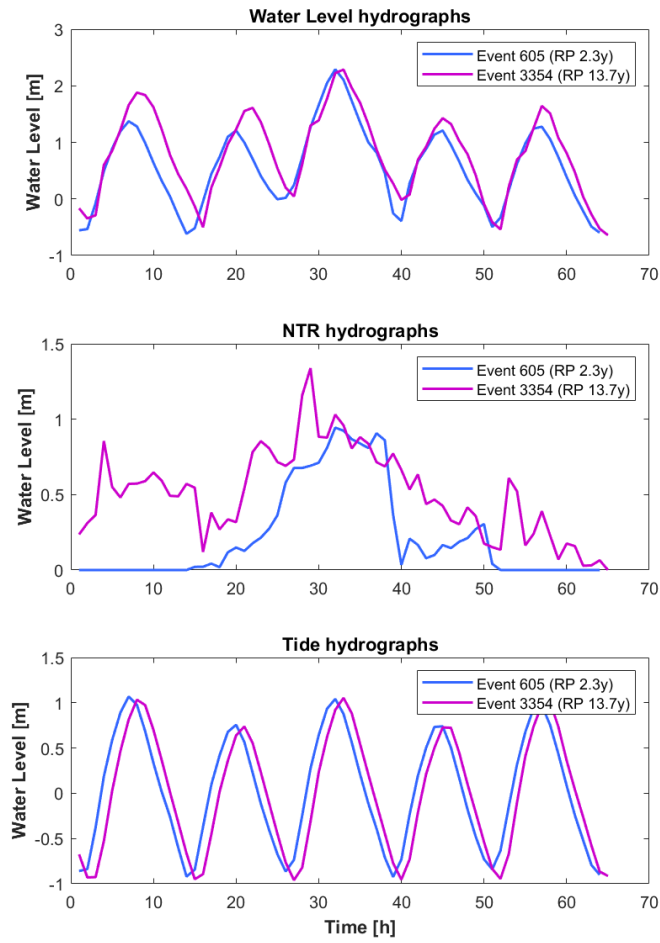

**Figure S4.** Time series of water levels, NTR, and Tide of the synthetic events that produce the 1% AEP water depth from the response approach.

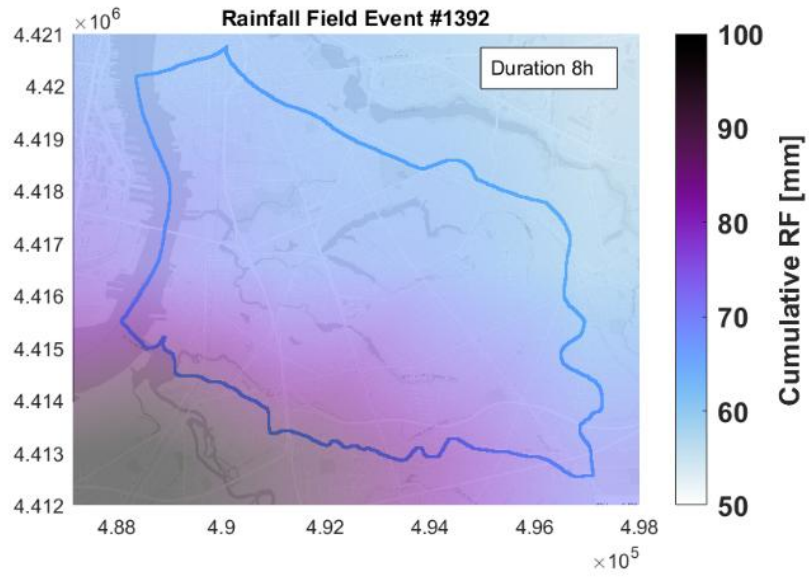

**Figure S5.** Accumulated rainfall field (over the event duration) of one of the events that produces the 1% AEP water depth in the pluvial hotspots of the study site. The return period of this event is 8.26 years.

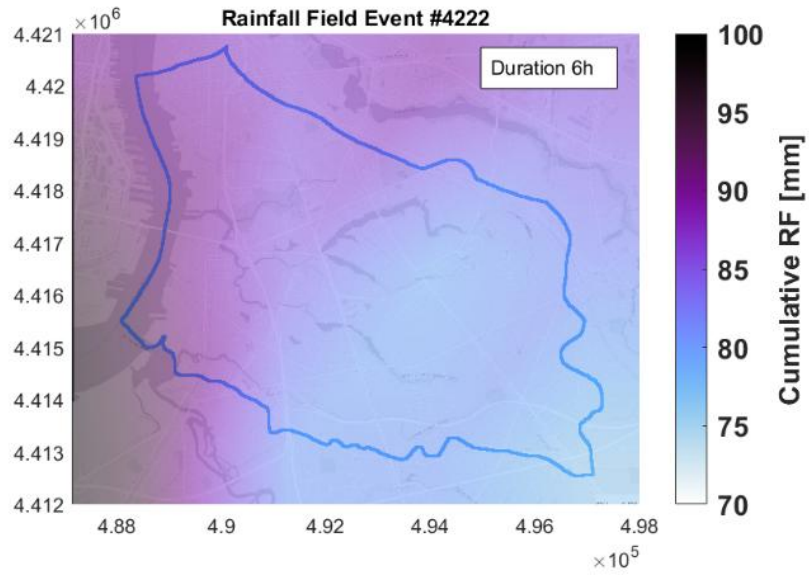

**Figure S6.** Accumulated rainfall field (over the event duration) of the other event that produces the 1% AEP water depth in the pluvial hotspots of the study site. The return period of this event is 8.85 years.
